# Supplementary material for: Improving function in people with hip-related pain: a systematic review and meta-analysis of physiotherapist-led interventions for hip-related pain
Source: PubMed Central journal article supplement — Br J Sports Med. 2020 May 6;54(23):1382–94. doi: 10.1136/bjsports-2019-101690 (PMC7677471; doi:10.1136/bjsports-2019-101690), 2020-05-06
Supplement: bjsports-2019-101690supp001.pdf [file bjsports-2019-101690supp001.pdf]

## Appendix 1: Search Strategies

### Part A: PICO search term development summary

P = human adults (18 to 50 years) with hip pain ['hip pain', 'femoracetabular impingement', 'hip joint', 'non arthritic hip pain', 'labr\*', 'acetabul\*', 'Coxa profunda', 'Profunda acetabul\*', 'os acetabul\*']

I = Physiotherapist-led interventions ['physiotherap\*', 'physical therap\*', 'exercis\*', 'therapy', 'rehabilitat\*', 'manual therap\*', 'manipulation therap\*', 'massage therap\*', 'non surg\*', 'non operative', 'tai chi', 'yoga' ]

C = sham treatment, no treatment, other treatment (e.g. surgery).

O = pain, function, other patient-reported outcome measures. Function may include hip joint ROM, hip muscle strength, measures of functional task performance, electromyography (EMG), gait analysis ['hip', 'muscle strength', 'range of motion', 'range of movement' 'range', 'movement', 'EMG', 'impairment', 'musculoskeletal', 'proprioception', 'balance', 'motor control', 'gait', 'kinematic'. 'stiffness', 'weakness', 'function\*', 'performance'].

### Part B: Full search strategies undertaken

Search conducted on 31/07/2018 at 4:03pm, and again 20/05/2019 at 4:12pm

### MEDLINE (via Ovid) search strategy

Database details: Ovid MEDLINE(R) Epub Ahead of Print, In-Process & Other Non-Indexed Citations, Ovid MEDLINE(R) Daily and Ovid MEDLINE(R) 1946 to Present

| # | Searches                                                                      |
|---|-------------------------------------------------------------------------------|
| 1 | exp Femoracetabular Impingement/                                              |
| 2 | non-arthritic hip pain.mp.                                                    |
| 3 | nonarthritic hip pain.mp.                                                     |
| 4 | ((femoracetabular or femoro-acetabular or femoroacetabular) adj2 imping*).mp. |
| 5 | labrum.tw.                                                                    |
| 6 | labral.tw.                                                                    |
| 7 | (hip adj2 imping*).mp.                                                        |
| 8 | (acetabul* adj2 retroversion).mp.                                             |

|    |                                                                                           |
|----|-------------------------------------------------------------------------------------------|
| 9  | (acetabul* adj2 (overcover* or over-cover*)).mp.                                          |
| 10 | coxa profunda.mp.                                                                         |
| 11 | ((profunda or protusio) adj2 acetabul*).mp.                                               |
| 12 | os acetabuli.mp.                                                                          |
| 13 | acetabular ossicle*.mp.                                                                   |
| 14 | ((hip or hips) adj2 pain*).mp.                                                            |
| 15 | pincer lesion.mp.                                                                         |
| 16 | (pincer adj2 (lesion* or imping*)).mp.                                                    |
| 17 | (cam adj2 (lesion* or imping*)).mp.                                                       |
| 18 | 1 or 2 or 3 or 4 or 5 or 6 or 7 or 8 or 9 or 10 or 11 or 12 or 13 or 14 or 15 or 16 or 17 |
| 19 | exercis*.mp.                                                                              |
| 20 | rehabilitat*.mp.                                                                          |
| 21 | physical therap*.mp.                                                                      |
| 22 | physiotherap*.mp.                                                                         |
| 23 | manual therapy.mp.                                                                        |
| 24 | nonsurgical.mp.                                                                           |
| 25 | non-surgical.mp.                                                                          |
| 26 | nonsurgery.mp.                                                                            |
| 27 | non-surgery.mp.                                                                           |
| 28 | nonoperative.mp.                                                                          |
| 29 | non-operative.mp.                                                                         |
| 30 | manipulation therap*.mp.                                                                  |
| 31 | therapeutic exercise.mp.                                                                  |
| 32 | (endurance adj (training or program* or therapy or activity or activities or regime)).tw. |
| 33 | (aerobic adj (training or program* or therapy or activities or activity or regime)).tw.   |
| 34 | (motion adj (training or fitness or therapy)).tw.                                         |
| 35 | resistance training.tw.                                                                   |
| 36 | balance training.tw.                                                                      |

|    |                                                           |
|----|-----------------------------------------------------------|
| 37 | mobility training.tw.                                     |
| 38 | functional training.tw.                                   |
| 39 | gait training.tw.                                         |
| 40 | ((multicomponent or multi-component) adj training).tw.    |
| 41 | strength* training.tw.                                    |
| 42 | plyometric*.mp.                                           |
| 43 | exp Physical Therapists/                                  |
| 44 | exp Rehabilitation/                                       |
| 45 | exp Physical Therapy Modalities/                          |
| 46 | exp Exercise Movement Techniques/                         |
| 47 | exp Exercise Therapy/                                     |
| 48 | exp Musculoskeletal Manipulations/                        |
| 49 | exp Conservative Treatment/                               |
| 50 | (hip adj2 strengthen*).mp.                                |
| 51 | (muscle adj2 strengthen*).mp.                             |
| 52 | ((isometric or isotonic or isokinetic) adj2 training).mp. |
| 53 | massage therap*.mp.                                       |
| 54 | yoga.tw.                                                  |
| 55 | tai chi.tw.                                               |
| 56 | (muscle adj2 stretching).tw.                              |
| 57 | (self-administer* adj2 program*).mp.                      |
| 58 | non-supervised.mp.                                        |
| 59 | or/19-58                                                  |
| 60 | 18 and 59                                                 |

## CINAHL (via EBSCO) search strategy

| #   | Query                                                                              |
|-----|------------------------------------------------------------------------------------|
| S1  | exercis*                                                                           |
| S2  | rehabilitat*                                                                       |
| S3  | physical therap*                                                                   |
| S4  | physiotherap*                                                                      |
| S5  | manual therapy                                                                     |
| S6  | nonsurgical                                                                        |
| S7  | non-surgical                                                                       |
| S8  | nonsurgery                                                                         |
| S9  | non-surgery                                                                        |
| S10 | nonoperative                                                                       |
| S11 | non-operative                                                                      |
| S12 | manipulation therap*                                                               |
| S13 | therapeutic exercise                                                               |
| S14 | endurance N2 (training or program* or therapy or activity or activities or regime) |
| S15 | aerobic N2 (training or program* or therapy or activities or activity or regime)   |
| S16 | motion N2 (training or fitness or therapy)                                         |
| S17 | resistance training                                                                |
| S18 | balance training                                                                   |
| S19 | mobility training                                                                  |

|     |                                                                                                                                                                                                                              |
|-----|------------------------------------------------------------------------------------------------------------------------------------------------------------------------------------------------------------------------------|
| S20 | functional training                                                                                                                                                                                                          |
| S21 | gait training                                                                                                                                                                                                                |
| S22 | (multicomponent or multi-component) N2 training                                                                                                                                                                              |
| S23 | strength* training                                                                                                                                                                                                           |
| S24 | plyometric*                                                                                                                                                                                                                  |
| S25 | (MH "Physical Therapy")                                                                                                                                                                                                      |
| S26 | (MH "Rehabilitation")                                                                                                                                                                                                        |
| S27 | (MH "Physical Therapists")                                                                                                                                                                                                   |
| S28 | (MH "Therapeutic Exercise+")                                                                                                                                                                                                 |
| S29 | (MH "Gait Training+")                                                                                                                                                                                                        |
| S30 | (MH "Functional Training")                                                                                                                                                                                                   |
| S31 | (MH "Manual Therapy+")                                                                                                                                                                                                       |
| S32 | (MH "Exercise+")                                                                                                                                                                                                             |
| S33 | S1 OR S2 OR S3 OR S4 OR S5 OR S6 OR S7 OR S8 OR S9 OR<br>S10 OR S11 OR S12 OR S13 OR S14 OR S15 OR S16 OR S17<br>OR S18 OR S19 OR S20 OR S21 OR S22 OR S23 OR S24 OR<br>S25 OR S26 OR S27 OR S28 OR S29 OR S30 OR S31 OR S32 |
| S34 | (MH "Femoracetabular Impingement")                                                                                                                                                                                           |
| S35 | femoracetabular imping*                                                                                                                                                                                                      |
| S36 | (femoro-acetabular or femoroacetabular) N2 imping*                                                                                                                                                                           |
| S37 | labrum                                                                                                                                                                                                                       |
| S38 | laboral                                                                                                                                                                                                                      |
| S39 | non-arthritic hip pain                                                                                                                                                                                                       |

|     |                                                                                                                                  |
|-----|----------------------------------------------------------------------------------------------------------------------------------|
| S40 | nonarthritic hip pain                                                                                                            |
| S41 | hip N2 imping*                                                                                                                   |
| S42 | (MH "Hip Labrum Tear")                                                                                                           |
| S43 | acetabul* N2 retroversion                                                                                                        |
| S44 | acetabul* N2 (overcover* or over-cover*)                                                                                         |
| S45 | coxa profunda                                                                                                                    |
| S46 | (profunda or protusio) N2 acetabul*                                                                                              |
| S47 | os acetabuli                                                                                                                     |
| S48 | acetabular ossicle*                                                                                                              |
| S49 | pincer lesion                                                                                                                    |
| S50 | pincer N2 (lesion* or imping*)                                                                                                   |
| S51 | cam N2 (lesion* or imping*)                                                                                                      |
| S52 | S34 OR S35 OR S36 OR S37 OR S38 OR S39 OR S40 OR S41<br>OR S42 OR S43 OR S44 OR S45 OR S46 OR S47 OR S48 OR<br>S49 OR S50 OR S51 |
| S53 | S33 AND S52                                                                                                                      |

### Cochrane Library search strategy

- #1 MeSH descriptor: [Femoracetabular Impingement] explode all trees
- #2 non-arthritis hip pain:ti,ab,kw
- #3 nonarthritic hip pain:ti,ab,kw
- #4 (femoracetabular or femoro-acetabular or femoroacetabular) near/2 imping\*:ti,ab,kw
- #5 labrum:ti,ab,kw

- #6 labral:ti,ab,kw
- #7 hip near/2 imping\*:ti,ab,kw 45
- #8 acetabul\* near/2 retroversion:ti,ab,kw
- #9 acetabul\* near/2 (overcover\* or over-cover\*):ti,ab,kw
- #10 coxa profunda:ti,ab,kw
- #11 (profunda or protusio) near/2 acetabul\*:ti,ab,kw
- #12 os acetabuli:ti,ab,kw
- #13 acetabular ossicle\*:ti,ab,kw
- #14 (hip or hips) near/2 pain\*:ti,ab,kw
- #15 pincer lesion:ti,ab,kw
- #16 pincer near/2 (lesion\* or imping\*):ti,ab,kw
- #17 cam near/2 (lesion\* or imping\*):ti,ab,kw
- #18 #1 or #2 or #3 or #4 or #5 or #6 or #7 or #8 or #9 or #10 or #11 or #12 or #13 or #14 or #15 or #16 or #17
- #19 exercis\*:ti,ab,kw
- #20 rehabilitat\*:ti,ab,kw
- #21 physical therap\*:ti,ab,kw
- #22 physiotherap\*:ti,ab,kw
- #23 manual therapy:ti,ab,kw
- #24 nonsurgical:ti,ab,kw
- #25 non-surgical:ti,ab,kw
- #26 nonsurgery:ti,ab,kw
- #27 non-surgery:ti,ab,kw
- #28 nonoperative:ti,ab,kw
- #29 non-operative:ti,ab,kw
- #30 manipulation therap\*:ti,ab,kw
- #31 therapeutic exercise:ti,ab,kw
- #32 endurance next (training or program\* or therapy or activity or activities or regime):ti,ab,kw
- #33 aerobic next (training or program\* or therapy or activities or activity or regime):ti,ab,kw
- #34 motion next (training or fitness or therapy):ti,ab,kw
- #35 resistance training:ti,ab,kw

- #36 balance training:ti,ab,kw
- #37 mobility training:ti,ab,kw
- #38 functional training:ti,ab,kw
- #39 gait training:ti,ab,kw
- #40 (multicomponent or multi-component) next training:ti,ab,kw
- #41 strength\* training:ti,ab,kw
- #42 plyometric\*:ti,ab,kw
- #43 MeSH descriptor: [Physical Therapists] explode all trees
- #44 MeSH descriptor: [Rehabilitation] explode all trees
- #45 MeSH descriptor: [Physical Therapy Modalities] explode all trees
- #46 MeSH descriptor: [Exercise Movement Techniques] explode all trees
- #47 MeSH descriptor: [Exercise Therapy] explode all trees
- #48 MeSH descriptor: [Musculoskeletal Manipulations] explode all trees
- #49 MeSH descriptor: [Conservative Treatment] explode all trees
- #50 hip near/2 strengthen\*:ti,ab,kw
- #51 muscle\* near/2 strengthen\*:ti,ab,kw
- #52 (isometric or isotonic or isokinetic) near/2 training:ti,ab,kw
- #53 massage therap\*:ti,ab,kw
- #54 yoga:ti,ab,kw
- #55 tai chi:ti,ab,kw
- #56 muscle\* near/2 stretching:ti,ab,kw
- #57 self-administer\* near/2 program\*:ti,ab,kw
- #58 non-supervised:ti,ab,kw
- #59 {or #19-#58}
- #60 #18 and #59

#### EMBASE (via Ovid) search strategy

Database details: Embase Classic+Embase 1947 to 2017 November 06



| #  | Searches                                                                                  |
|----|-------------------------------------------------------------------------------------------|
| 1  | exp femoroacetabular impingement/                                                         |
| 2  | non-arthritic hip pain.mp.                                                                |
| 3  | nonarthritic hip pain.mp.                                                                 |
| 4  | ((femoracetabular or femoro-acetabular or femoroacetabular) adj2 imping*).mp.             |
| 5  | labrum.tw.                                                                                |
| 6  | labral.tw.                                                                                |
| 7  | (hip adj2 imping*).mp.                                                                    |
| 8  | (acetabul* adj2 retroversion).mp.                                                         |
| 9  | (acetabul* adj2 (overcover* or over-cover*)).mp.                                          |
| 10 | coxa profunda.mp.                                                                         |
| 11 | ((profunda or protusio) adj2 acetabul*).mp.                                               |
| 12 | os acetabuli.mp.                                                                          |
| 13 | acetabular ossicle*.mp.                                                                   |
| 14 | ((hip or hips) adj2 pain*).mp.                                                            |
| 15 | pincer lesion.mp.                                                                         |
| 16 | (pincer adj2 (lesion* or imping*)).mp.                                                    |
| 17 | (cam adj2 (lesion* or imping*)).mp.                                                       |
| 18 | 1 or 2 or 3 or 4 or 5 or 6 or 7 or 8 or 9 or 10 or 11 or 12 or 13 or 14 or 15 or 16 or 17 |
| 19 | exercis*.mp.                                                                              |
| 20 | rehabilitat*.mp.                                                                          |
| 21 | physical therap*.mp.                                                                      |
| 22 | physiotherap*.mp.                                                                         |
| 23 | manual therapy.mp.                                                                        |
| 24 | nonsurgical.mp.                                                                           |
| 25 | non-surgical.mp.                                                                          |
| 26 | nonsurgery.mp.                                                                            |

|    |                                                                                                                                                                                                   |
|----|---------------------------------------------------------------------------------------------------------------------------------------------------------------------------------------------------|
| 27 | non-surgery.mp.                                                                                                                                                                                   |
| 28 | nonoperative.mp.                                                                                                                                                                                  |
| 29 | non-operative.mp.                                                                                                                                                                                 |
| 30 | manipulation therap*.mp.                                                                                                                                                                          |
| 31 | therapeutic exercise.mp.                                                                                                                                                                          |
| 32 | (endurance adj (training or program* or therapy or activity or activities or regime)).tw.                                                                                                         |
| 33 | (aerobic adj (training or program* or therapy or activities or activity or regime)).tw.                                                                                                           |
| 34 | (motion adj (training or fitness or therapy)).tw.                                                                                                                                                 |
| 35 | resistance training.tw.                                                                                                                                                                           |
| 36 | balance training.tw.                                                                                                                                                                              |
| 37 | mobility training.tw.                                                                                                                                                                             |
| 38 | functional training.tw.                                                                                                                                                                           |
| 39 | gait training.tw.                                                                                                                                                                                 |
| 40 | ((multicomponent or multi-component) adj training).tw.                                                                                                                                            |
| 41 | strength* training.tw.                                                                                                                                                                            |
| 42 | plyometric*.mp.                                                                                                                                                                                   |
| 43 | exp physiotherapist/                                                                                                                                                                              |
| 44 | exp rehabilitation/                                                                                                                                                                               |
| 45 | exp isokinetic exercise/ or exp isometric exercise/ or exp movement therapy/ or exp muscle training/ or exp pilates/ or exp plyometrics/ or exp stretching exercise/ or exp tai chi/ or exp yoga/ |
| 46 | exp kinesiotherapy/                                                                                                                                                                               |
| 47 | exp musculoskeletal manipulation/                                                                                                                                                                 |
| 48 | (hip adj2 strengthen*).mp.                                                                                                                                                                        |
| 49 | (muscle adj2 strengthen*).mp.                                                                                                                                                                     |
| 50 | ((isometric or isotonic or isokinetic) adj2 training).mp.                                                                                                                                         |
| 51 | massage therap*.mp.                                                                                                                                                                               |

|    |                                      |
|----|--------------------------------------|
| 52 | yoga.tw.                             |
| 53 | tai chi.tw.                          |
| 54 | (muscle adj2 stretching).tw.         |
| 55 | (self-administer* adj2 program*).mp. |
| 56 | non-supervised.mp.                   |
| 57 | or/19-56                             |
| 58 | 18 and 57                            |
| 59 | limit 58 to exclude medline journals |
